# Supplementary material for: Catalytic wet peroxide oxidation of phenol by [C16H33(CH3)3N]4H2SiV2W10O40catalyst
Source: Royal Society of Chemistry journal article supplement (doi:10.1039/c3ra46453a), 2014-01-01
Supplement: c3ra46453a.pdf [file c3ra46453a.pdf]

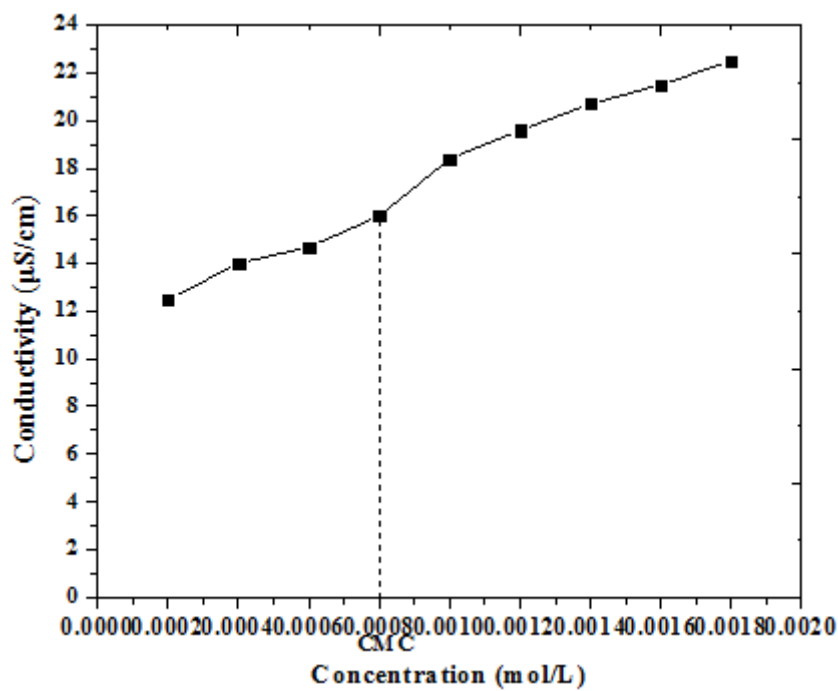

Fig. S1. The CMC of  $[C_{16}]_4H_2SiW_{10}V_2$  at 25°C

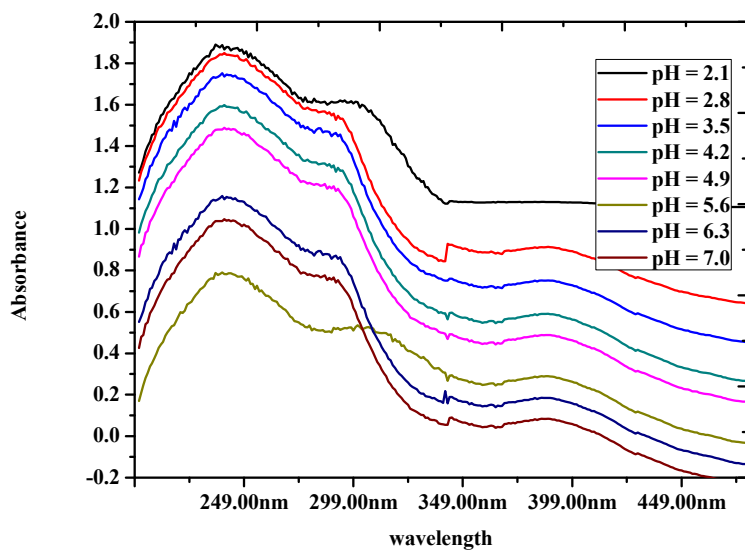

Fig. S2. The UV-vis spectrum of peroxy-polyoxometalate at different pH

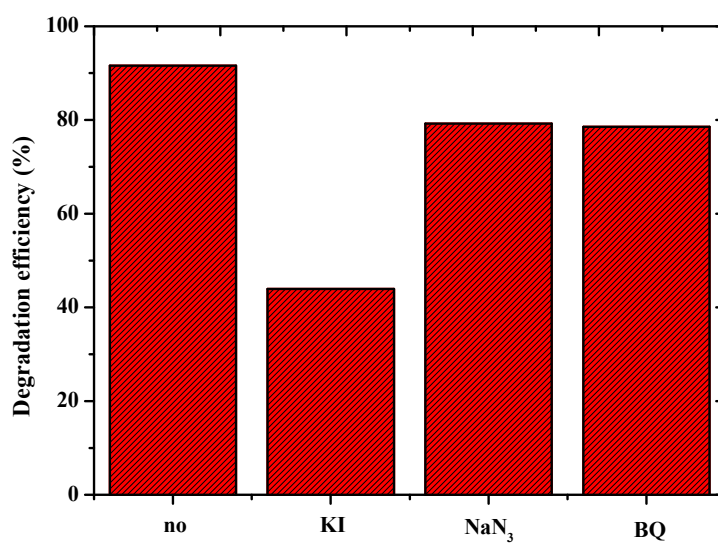

**Fig. S3.** Effects of scavenging agents on degradation of phenol in the presence of 2mM of 1,4-benzoquinone (BQ), NaN<sub>3</sub> and KI with [C<sub>16</sub>]<sub>4</sub>H<sub>2</sub>SiW<sub>10</sub>V<sub>2</sub> (0.80mM) with H<sub>2</sub>O<sub>2</sub> (0.23M) for 90 min

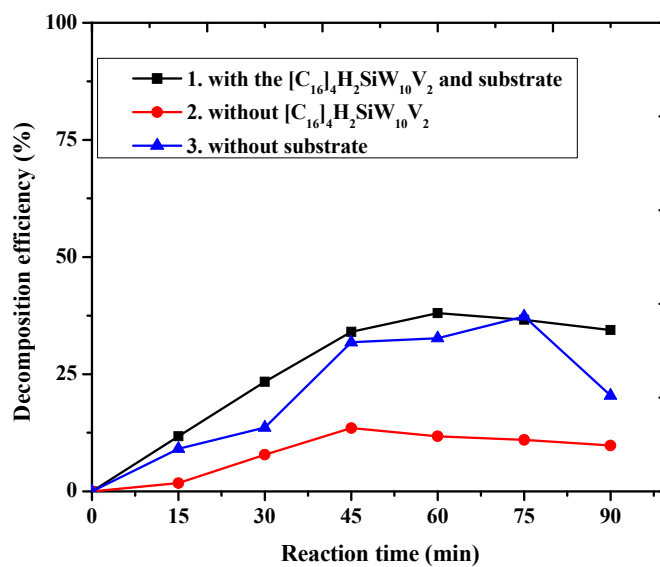

**Fig. S4.** The decomposition efficiency of (1) hydrogen peroxide with the catalyst and substrate, (2) hydrogen peroxide without catalyst, (3) hydrogen peroxide without substrate

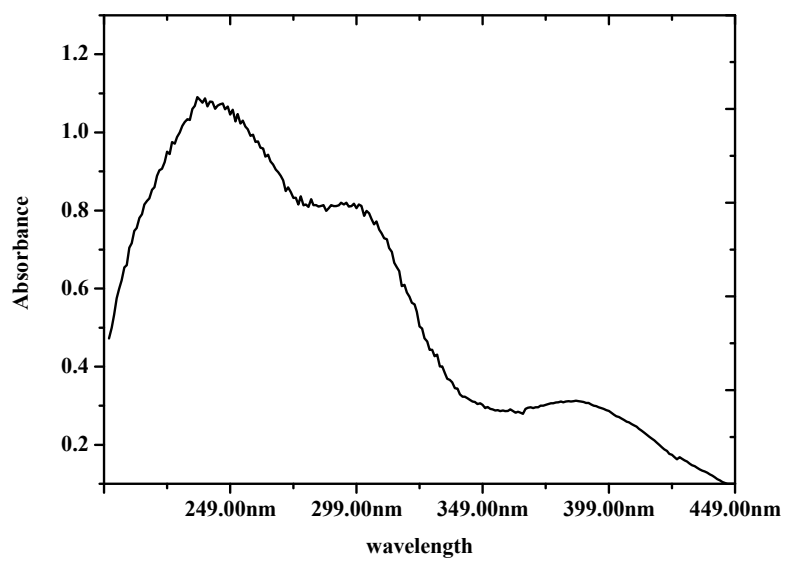

**Fig. S5.** The UV-vis spectrum of peroxy-polyoxometalate at pH = 2.1 ( $\text{Na}_2\text{SO}_4\text{-H}_2\text{SO}_4$ )
